# Supplementary material for: CRISPR-Mediated Triple Knockout of SLAMF1, SLAMF5 and SLAMF6 Supports Positive Signaling Roles in NKT Cell Development
Source: PubMed Central journal article supplement (PMC4892526; doi:10.1371/journal.pone.0156072), 2016-06-03
Supplement: pone.0156072.s002.pdf [file pone.0156072.s002.pdf]

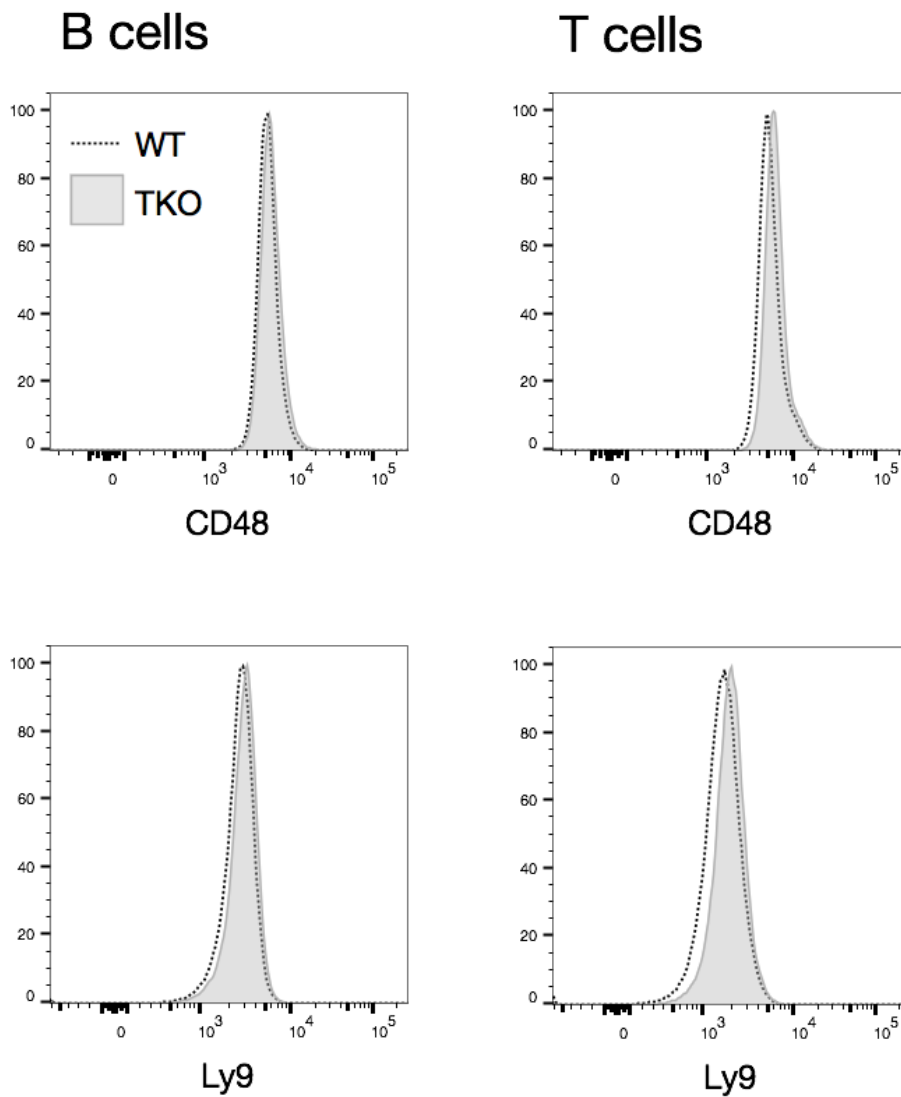

**S2 Figure. Comparable CD48 and Ly9 expression in WT and TKO mice.** Representative flow cytometry plots of CD48 and Ly9 in spleen of WT and TKO mice. B cells were gated on live B220<sup>+</sup> cells, and T cells were gated on live CD4<sup>+</sup> plus live CD8<sup>+</sup> cells. Data are representative of 2 independent experiments, n=4 mice/genotype.
