# Supplementary material for: CRISPR-Mediated Triple Knockout of SLAMF1, SLAMF5 and SLAMF6 Supports Positive Signaling Roles in NKT Cell Development
Source: PubMed Central journal article supplement (PMC4892526; doi:10.1371/journal.pone.0156072), 2016-06-03
Supplement: pone.0156072.s003.pdf [file pone.0156072.s003.pdf]

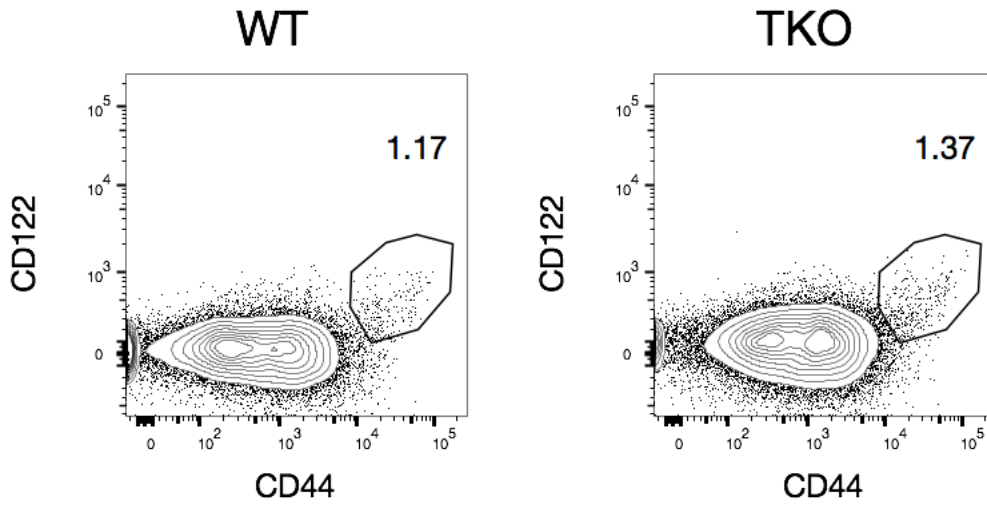

**S3 Figure. Normal frequencies of innate-like CD8<sup>+</sup> T cells in thymus of TKO mice.** Representative flow cytometry plots of innate-like CD8<sup>+</sup>CD44<sup>+</sup>CD122<sup>+</sup> T cells, gated on CD8<sup>+</sup>CD4<sup>-</sup> single positive cells. Data are representative of 2 independent experiments, n=4 mice/genotype.
