# Supplementary material for: CRISPR-Mediated Triple Knockout of SLAMF1, SLAMF5 and SLAMF6 Supports Positive Signaling Roles in NKT Cell Development
Source: PubMed Central journal article supplement (PMC4892526; doi:10.1371/journal.pone.0156072), 2016-06-03
Supplement: pone.0156072.s004.pdf [file pone.0156072.s004.pdf]

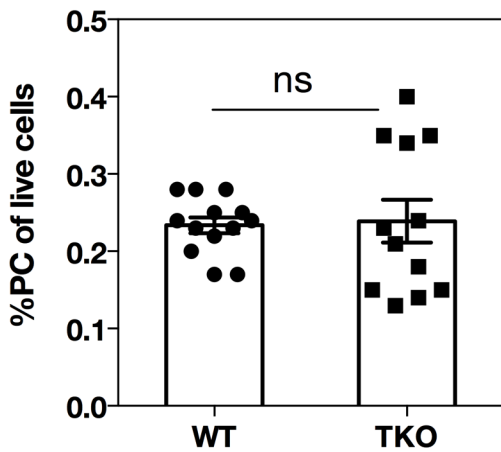

**S4 Figure. Comparable frequencies of plasma cells following protein immunization of WT and TKO mice.** Quantitation of plasma cells in the spleen, 7 days post-immunization I.P. with NP-ova and Sigma Adjuvant System. Plasma cells were gated on live CD19<sup>med</sup>CD138<sup>+</sup> cells. Data were pooled from 2 independent experiments, n=12-13 mice/genotype. Error bars show s.e.m., group means were compared by *t*-test, ns = not significant.
