# Supplementary material for: CRISPR-Mediated Triple Knockout of SLAMF1, SLAMF5 and SLAMF6 Supports Positive Signaling Roles in NKT Cell Development
Source: PubMed Central journal article supplement (PMC4892526; doi:10.1371/journal.pone.0156072), 2016-06-03
Supplement: pone.0156072.s006.pdf [file pone.0156072.s006.pdf]

| Target                    | Guide sequence                                                                                                                                                                                 | Final Concentration (ng/ul) | Cloning oligos                                       |
|---------------------------|------------------------------------------------------------------------------------------------------------------------------------------------------------------------------------------------|-----------------------------|------------------------------------------------------|
| <b>Injection 1</b>        |                                                                                                                                                                                                |                             |                                                      |
| <i>Slamf5</i>             | AGCTGAAGTTACCATAACCC                                                                                                                                                                           | 2.5                         | TAGGAGCTGAAGTTACCATAACCC<br>AAACGGGTTATGGTAACTTCAGCT |
| <i>Slamf6</i>             | GATTACTTAGGTTGATAACG                                                                                                                                                                           | 2.5                         | TAGGGATTACTTAGGTTGATAACG<br>AAACCGTTATCAACCTAAGTAATC |
| <i>Slamf1</i>             | GTCACCATGGCGACGTCCCC                                                                                                                                                                           | 2.5                         | TAGGGTCACCATGGCGACGTCCCC<br>AAACGGGGACGTCGCCATGGTGAC |
| SpCas9                    |                                                                                                                                                                                                | 5                           |                                                      |
| Donor oligo               | See below                                                                                                                                                                                      | 10                          |                                                      |
| <i>Slamf5</i> donor oligo | GAACCAAAGAAAATTGACAACATTGCCTGGACTTCTCAATCATCTGTTGCTTTTATAAAACCAGG<br>AGTCAATAAAGCTGAAGTTACCATATAAGCTTGCATTATAAAGGACGAATAGAAATCATAGATC<br>AGAAGTATGACCTGGTCATTAGAGACCTGAGGATGGAAGATGCAGGAACCTAC |                             |                                                      |
| <i>Slamf6</i> donor oligo | AGGAGAGTCTGCAGTTCTTCTCTAAAGCTTCTGCAGGGAAGATAGCCAATATCATCATCTGGA<br>ATTATGAATGGGAAGCGTCACAAGTCACCTGAGGATCCTATCAACCTAAGTAATCCTGAAAGTCC<br>ACAAATCATGAACACTGATGTAAGAAGAGACTGAACATCACCCAGTCTACTC   |                             |                                                      |
| <i>Slamf1</i> donor oligo | CACGTGGCTGCCCTGACGAATGAACATCAGATAAATAAGAGCGTGAACAAAAGTGTCCGCATCC<br>TCGTACCATGGCGACGTCTTAAGCTTAAGCAAATCCAACAAGAAAATTGTGTCTTTTGATCTCT<br>CTAAAGGGAGCTATCCAGATCACCTGGAGGATGGTACCACTTTCAATCA      |                             |                                                      |
| <b>Injection 2</b>        |                                                                                                                                                                                                |                             |                                                      |
| <i>Slamf5</i>             | GGTAATGAATGGGATTCTTG                                                                                                                                                                           | 5                           | TAGGTAATGAATGGGATTCTTG<br>AAACCAAGAATCCCATTCTTA      |
|                           | GCAGACCCGGTGGTAATGAA                                                                                                                                                                           | 5                           | TAGGCAGACCCGGTGGTAATGAA<br>AAACTTCATTACCACCGGGTCTG   |
| <i>Slamf6</i>             | GGTAAGGTTGCTGATTTGCA                                                                                                                                                                           | 5                           | TAGGTAAGGTTGCTGATTTGCA<br>AAACTGCAAATCAGCAACCTTA     |
|                           | GTGGACTTTTCAGGATTACTT                                                                                                                                                                          | 5                           | TAGGTGGACTTTTCAGGATTACTT<br>AAACAAGTAATCCTGAAAGTCCA  |
| <i>Slamf1</i>             | GATTCTCCAGAAGCTGGGAC                                                                                                                                                                           | 5                           | TAGGATTCTCCAGAAGCTGGGAC<br>AAACGTCCCAGCTTCTGGAGAAT   |
|                           | GTCACCATGGCGACGTCCCC                                                                                                                                                                           | 5                           | TAGGGTCACCATGGCGACGTCCCC<br>AAACGGGGACGTCGCCATGGTGAC |
| SpCas9                    |                                                                                                                                                                                                | 50                          |                                                      |
| <b>Injection 3a</b>       |                                                                                                                                                                                                |                             |                                                      |
| <i>Slamf5</i>             | GCAGACCCGGTGGTAATGAA                                                                                                                                                                           | 10                          | TAGGCAGACCCGGTGGTAATGAA<br>AAACTTCATTACCACCGGGTCTG   |
| <i>Slamf6</i>             | GTGGACTTTTCAGGATTACTT                                                                                                                                                                          | 10                          | TAGGTGGACTTTTCAGGATTACTT<br>AAACAAGTAATCCTGAAAGTCCA  |
| SpCas9                    |                                                                                                                                                                                                | 50                          |                                                      |
| <b>Injection 3b</b>       |                                                                                                                                                                                                |                             |                                                      |
| <i>Slamf5</i>             | GGTAATGAATGGGATTCTTG                                                                                                                                                                           | 10                          | TAGGTAATGAATGGGATTCTTG                               |

|               |                      |    |                                                                |
|---------------|----------------------|----|----------------------------------------------------------------|
|               |                      |    | <b>AAACCAAGAATCCCATTCATTA</b>                                  |
| <i>Slamf6</i> | GGTAAGGTTGCTGATTTGCA | 10 | <b>TAGGTAAGGTTGCTGATTTGCA</b><br><b>AAACTGCAAATCAGCAACCTTA</b> |
| SpCas9        |                      | 50 |                                                                |

**S2 Table. Sequences of the 20-nucleotide guides, the concentrations used in the microinjections, the guide sequence oligos used for cloning into the T7 sgRNA vector (Transposagen), and the donor oligos.** Overhangs are in bold, restriction sites are highlighted in grey.
